# Supplementary material
Source: PubMed Central journal article supplement (PMC7266609)
Supplement: mmc1.pdf [file mmc1.pdf]

# THE LANCET

## Microbe

### **Supplementary appendix**

This appendix formed part of the original submission and has been peer reviewed. We post it as supplied by the authors.

Supplement to: The COVID-19 Genomics UK (COG-UK) consortium. An integrated national scale SARS-CoV-2 genomic surveillance network. *Lancet Microbe* 2020; published online June 2. [https://doi.org/10.1016/S2666-5247\(20\)30054-9](https://doi.org/10.1016/S2666-5247(20)30054-9).

## Appendix

### COG-UK author list

David M Aanensen<sup>1,2</sup>, Khalil Abudahab<sup>1,2</sup>, Alexander Adams<sup>3</sup>, Safiah Afifi<sup>4</sup>, Mohammed T Alam<sup>5</sup>, Alex Alderton<sup>6</sup>, Nabil-Fareed Alikhan<sup>7</sup>, John Allan<sup>8</sup>, Mai Almsaud<sup>9</sup>, Abdulrahman Alrezaihi<sup>9</sup>, Muhannad Alruwaili<sup>9</sup>, Roberto Amato<sup>6</sup>, Monique Andersson<sup>10</sup>, Adrienn Angyal<sup>11</sup>, Elihu Aranday-Cortes<sup>12</sup>, Cristina Ariani<sup>6</sup>, Stuart D Armstrong<sup>9</sup>, Patawee Asamaphan<sup>12</sup>, Stephen Attwood<sup>13</sup>, Alp Aydin<sup>7</sup>, Anjna Badhan<sup>14</sup>, David Baker<sup>7</sup>, Paul Baker<sup>15</sup>, Carlos E Balcazar<sup>16</sup>, Jonathan Ball<sup>17</sup>, Edward Barton<sup>18</sup>, Matthew Bashton<sup>8</sup>, Laura Baxter<sup>5</sup>, Matthew Beale<sup>6</sup>, Charlotte Beaver<sup>6</sup>, Angela Beckett<sup>19</sup>, Rob Beer<sup>4</sup>, Andrew Beggs<sup>20</sup>, Andrew Bell<sup>7</sup>, Katherine L Bellis<sup>6,21</sup>, Eleanor G Bentley<sup>9</sup>, Matt Berriman<sup>6</sup>, Emma Betteridge<sup>6</sup>, David Bibby<sup>22</sup>, Kelly Bicknell<sup>23</sup>, Alec Birchley<sup>3</sup>, Gary Black<sup>8</sup>, Beth Blane<sup>21</sup>, Samuel Bloomfield<sup>7</sup>, Frankie Bolt<sup>24,25</sup>, David G Bonsall<sup>26</sup>, Andrew Bosworth<sup>27</sup>, Yann Bourgeois<sup>28</sup>, Olivia Boyd<sup>29</sup>, Daniel Bradshaw<sup>22</sup>, Judy Breuer<sup>30</sup>, Hannah Bridgewater<sup>5</sup>, Tony Brooks<sup>30</sup>, Alice Broos<sup>12</sup>, Julianne R Brown<sup>31</sup>, Rebecca L Brown<sup>11</sup>, Kirstyn Bruncker<sup>12</sup>, Giselda Bucca<sup>32</sup>, David Buck<sup>26</sup>, Matthew Bull<sup>3</sup>, Ethan Butcher<sup>23</sup>, Sarah L Caddy<sup>33</sup>, Laura G Caller<sup>34</sup>, Sharon Cambell<sup>35</sup>, Matthew Carlile<sup>36</sup>, Stephen Carmichael<sup>12</sup>, Laura Carrilero<sup>11</sup>, Sergi Castellano<sup>30</sup>, Jennifer Chaloner<sup>37</sup>, Meera Chand<sup>22</sup>, Michael R Chapman<sup>6,21,38</sup>, Joseph Chappell<sup>17</sup>, Ian Charles<sup>7</sup>, Anoop J Chauhan<sup>23</sup>, Anu Chawla<sup>39</sup>, Jeff Cheng<sup>5</sup>, Carol M Churcher<sup>21</sup>, Gemma Clark<sup>40</sup>, Jordan J Clark<sup>9</sup>, Jennifer Collins<sup>41</sup>, Rachel Colquhoun<sup>16</sup>, Thomas R Connor<sup>3,42</sup>, Chrystala Constantinidou<sup>5</sup>, Jason Coombes<sup>3</sup>, Sally Corden<sup>3</sup>, Simon Cottrell<sup>3</sup>, Angela Cowell<sup>39</sup>, Martin D Curran<sup>27,43</sup>, Tanya Curran<sup>44,45</sup>, Gavin Dabrera<sup>22</sup>, John Danesh<sup>6</sup>, Alistair C Darby<sup>9</sup>, Mariateresa de Cesare<sup>26</sup>, Leonardo de Oliveira Martins<sup>7</sup>, Thushan I de Silva<sup>11,46</sup>, Bisrat Debebe<sup>36</sup>, Samir Dervisevic<sup>47</sup>, Rebecca A Dewar<sup>16,48</sup>, Maria Diaz<sup>7</sup>, Matthew Dorman<sup>6</sup>, Gordon Dougan<sup>49</sup>, Lynn Dover<sup>8</sup>, Fatima Downing<sup>3</sup>, Eleanor Drury<sup>6</sup>, Louis du Plessis<sup>13</sup>, Patricia L Dyal<sup>30</sup>, Richard Eccles<sup>9</sup>, Sue Edwards<sup>3</sup>, Nicholas Ellaby<sup>22</sup>, Scott Elliott<sup>23</sup>, Gary Eltringham<sup>41</sup>, Ngozi Elumogo<sup>47</sup>, Sarah Essex<sup>15</sup>, Cariad M Evans<sup>46</sup>, Johnathan Evans<sup>3</sup>, Fabricia F. Nascimento<sup>29</sup>, Derek J Fairley<sup>44,45</sup>, Ben Farr<sup>6</sup>, Theresa Feltwell<sup>49</sup>, Neil Ferguson<sup>29</sup>, Ana da Silva Filipe<sup>12</sup>, Jacqueline Findlay<sup>30</sup>, Leysa M Forrest<sup>30</sup>, Sally Forrest<sup>21</sup>, Luke Foulser<sup>6</sup>, Sarah Francois<sup>13</sup>, Christophe Fraser<sup>26</sup>, Lucy Frost<sup>5</sup>, Eileen Gallagher<sup>22</sup>, Michael D Gallagher<sup>16</sup>, Isabel García-Dorival<sup>9</sup>, Amy Gaskin<sup>3</sup>, Bree Gatica-Wilcox<sup>3</sup>, Artemis Gavriil<sup>30</sup>, Lily Geidelberg<sup>29</sup>, Matthew Gemmell<sup>9</sup>, Alessandro Gerada<sup>39</sup>, Laura Gifford<sup>3</sup>, Lauren Gilbert<sup>3</sup>, Paul Gilmore<sup>9</sup>, Rachel Gilroy<sup>7</sup>, Sophia Girgis<sup>21</sup>, Sharon Glaysher<sup>23</sup>, Tanya Golubchik<sup>26</sup>, Sonia Goncalves<sup>6</sup>, Ian Goodfellow<sup>34</sup>, Scott Goodwin<sup>6</sup>, Clive Graham<sup>18</sup>, Lee Graham<sup>3</sup>, Dimitris Grammatopoulos<sup>20</sup>, Angie Green<sup>26</sup>, Luke R Green<sup>11</sup>, Jane Greenaway<sup>15</sup>, Richard Gregory<sup>9</sup>, Danielle C Groves<sup>11</sup>, Natalie Groves<sup>22</sup>, Martyn Guest<sup>42</sup>, Rory Gunson<sup>50</sup>, Sam Haldenby<sup>9</sup>, Grant Hall<sup>34</sup>, William L Hamilton<sup>51</sup>, Ximeng Han<sup>9</sup>, Kathryn A Harris<sup>31</sup>, Ewan M Harrison<sup>6,21</sup>, Catherine Hartley<sup>9</sup>, Carolina Herrera<sup>52</sup>, Andrew Hesketh<sup>32</sup>, David Heyburn<sup>3</sup>, Verity Hill<sup>16</sup>, Julian A Hiscox<sup>9</sup>, Matthew Holden<sup>53,54</sup>, Alison Holmes<sup>24,25</sup>, Nadine Holmes<sup>36</sup>, Giles S Holt<sup>55</sup>, Rich Hopes<sup>56</sup>, Myra Hosmillo<sup>34</sup>, Charlotte J Houldcroft<sup>49</sup>, Hannah Howson-Wells<sup>40</sup>, Jonathan Hubb<sup>22</sup>, Joseph Hughes<sup>12</sup>, Margaret Hughes<sup>9</sup>, Stephanie Hutchings<sup>56</sup>, Robert Impey<sup>23</sup>, Miren Iturriza-Gomara<sup>9</sup>, Adam Jackson<sup>6</sup>, Ben Jackson<sup>16</sup>, David K Jackson<sup>6</sup>, Aminu S Jahun<sup>34</sup>, Keith James<sup>6</sup>, Dorota Jamrozy<sup>6</sup>, Aaron Jeffries<sup>57</sup>, Natasha Jesudason<sup>12</sup>, Michaela John<sup>4</sup>, James Johnson<sup>9</sup>, Katie J Johnson<sup>46</sup>, Natasha Johnson<sup>12</sup>, Ian Johnston<sup>6</sup>, Benjamin Jones<sup>9</sup>, Rachel Jones<sup>3</sup>, Sophie Jones<sup>3</sup>, David Jorgensen<sup>29</sup>, Leanne Kane<sup>6</sup>, Gemma L Kay<sup>7</sup>, Sally Kay<sup>6</sup>, Jon-Paul Keatley<sup>6</sup>,

Alexander J Keeley<sup>11,46</sup>, Manjinder Khakh<sup>40</sup>, Fahad A Khokhar<sup>49</sup>, Christine Kitchen<sup>42</sup>, Bridget Knight<sup>58</sup>, Anastasia Kolyva<sup>7</sup>, Moritz Kraemer<sup>13</sup>, Mark Kristiansen<sup>30</sup>, Sara Kumziene-Summerhayes<sup>3</sup>, Dominic Kwiatkowski<sup>2,6</sup>, Angie Lackenby<sup>22</sup>, Cordelia Langford<sup>6</sup>, Mara Lawniczak<sup>6</sup>, Thanh Le-Viet<sup>7</sup>, David Lee<sup>22</sup>, Laura Letchford<sup>6</sup>, Kathy Li<sup>12</sup>, Ling Li<sup>24</sup>, Steve Liggett<sup>15</sup>, Benjamin B Lindsey<sup>11,46</sup>, Rich Livett<sup>6</sup>, Allyson Lloyd<sup>23</sup>, Stephanie Lo<sup>6</sup>, Michael Lockhart<sup>53</sup>, Joshua Loh<sup>8</sup>, Nicholas J Loman<sup>59</sup>, Matthew Loose<sup>36</sup>, Anita Lucaci<sup>9</sup>, Catherine Ludden<sup>6</sup>, Lisa Luu<sup>9</sup>, Ronan A Lyons<sup>60</sup>, George MacIntyre-Cockett<sup>26</sup>, Alasdair MacLean<sup>50</sup>, Daniel Mair<sup>12</sup>, Josh Maksimovic<sup>4</sup>, Robyn Manley<sup>57</sup>, Carmen Manso<sup>22</sup>, Jenifer Manson<sup>39</sup>, Inigo Martincorena<sup>6</sup>, Jane Masoli<sup>61</sup>, Alison E Mather<sup>7</sup>, Tamyo Mbisa<sup>22</sup>, Kathryn McCluggage<sup>4</sup>, Patrick McClure<sup>17</sup>, JT McCrone<sup>16</sup>, Sarah McDonald<sup>12</sup>, Martin P McHugh<sup>16,48,54</sup>, James M McKenna<sup>44,45</sup>, Liz McMinn<sup>6</sup>, Claire McMurray<sup>59</sup>, Lizzie Meadows<sup>7</sup>, Mirko Menegazzo<sup>1,2</sup>, Luke W Meredith<sup>34</sup>, Ian Merrick<sup>42</sup>, Lamia Mestek-Boukhibar<sup>30</sup>, Shahjahan Miah<sup>22</sup>, Stephen Michell<sup>57</sup>, Michelle L Michelsen<sup>57</sup>, Zoltan Molnar<sup>45</sup>, Catherine Moore<sup>3</sup>, Catrin Moore<sup>10</sup>, Christopher Moore<sup>36</sup>, Nathan Moore<sup>62</sup>, Mari Morgan<sup>3</sup>, Sian Morgan<sup>4</sup>, Dawn Muddyman<sup>1,2</sup>, David A Muir<sup>24</sup>, Peter Muir<sup>56</sup>, Richard Myers<sup>22</sup>, Eleni Nastouli<sup>63</sup>, Plamena Naydenova<sup>21</sup>, Andrew Nelson<sup>64</sup>, Charlotte Nelson<sup>9</sup>, Rachel Nelson<sup>6</sup>, Samuel Nicholls<sup>59</sup>, Jenna Nichols<sup>12</sup>, Marc Niebel<sup>12</sup>, Paola Niola<sup>30</sup>, Kyriaki Nomikou<sup>12</sup>, Justin O'Grady<sup>7</sup>, Áine N O'Toole<sup>16</sup>, Elaine O'Toole<sup>39</sup>, Cassie Olateju<sup>39</sup>, Richard J Orton<sup>12</sup>, Husam Osman<sup>27</sup>, Sascha Ott<sup>20</sup>, Nicole Pacchiarini<sup>3</sup>, Debra Padgett<sup>18</sup>, Andrew J Page<sup>7</sup>, Sophie Palmer<sup>21</sup>, Steve Palmer<sup>6</sup>, Yasmin N Panchbhaya<sup>30</sup>, Sarojini Pandey<sup>5</sup>, Naomi Park<sup>6</sup>, Matthew D Parker<sup>11</sup>, Julian Parkhill<sup>65</sup>, Yasmin A Parr<sup>12</sup>, Paul J Parsons<sup>11</sup>, David G Partridge<sup>46</sup>, Minal Patel<sup>6</sup>, Steve Patterson<sup>9</sup>, Brendan Payne<sup>41</sup>, Sharon J Peacock<sup>21,27</sup>, Rebekah Penrice-Randal<sup>9</sup>, Malorie Perry<sup>3</sup>, Steven Platt<sup>22</sup>, Radoslaw Poplawski<sup>59</sup>, Reenesh Prakash<sup>47</sup>, Liam Prestwood<sup>6</sup>, Anna Price<sup>42</sup>, James R Price<sup>24,25</sup>, Christoph Puethe<sup>6</sup>, Oliver Pybus<sup>13</sup>, Hannah Pymont<sup>56</sup>, Mike Quail<sup>6</sup>, Joshua Quick<sup>59</sup>, Jayna Raghwan<sup>13</sup>, Manon Ragonnet-Cronin<sup>29</sup>, Saadia Rahman<sup>30</sup>, Lucille Rainbow<sup>9</sup>, Shavanthi Rajatileka<sup>6</sup>, Andrew Rambaut<sup>16</sup>, Mary Ramsay<sup>22</sup>, Paul A Randell<sup>24</sup>, Nadine P Randle<sup>9</sup>, Veena Raviprakash<sup>35</sup>, Mohammad Raza<sup>46</sup>, Paola Resende Silva<sup>30</sup>, Sara Rey<sup>3</sup>, Alex Richter<sup>20</sup>, David L Robertson<sup>12</sup>, Trevor Ian Robinson<sup>39</sup>, Samuel C Robson<sup>19</sup>, Stefan Rooke<sup>16</sup>, Aileen Rowan<sup>14</sup>, Will Rowe<sup>59</sup>, Sunando Roy<sup>30</sup>, Steven Rudder<sup>7</sup>, Chris Ruis<sup>21</sup>, Fei Sang<sup>36</sup>, Garry Scarlett<sup>28</sup>, Ulf Schaefer<sup>22</sup>, Carol Scott<sup>6</sup>, Garren Scott<sup>18</sup>, Dheeraj Sethi<sup>47</sup>, Sharif Shaaban<sup>53</sup>, Rajiv Shah<sup>12</sup>, Parul Sharma<sup>9</sup>, Ghada T Shawli<sup>9</sup>, James Shepherd<sup>12</sup>, Nicola Sherriff<sup>35</sup>, Lesley Shirley<sup>6</sup>, John Sillitoe<sup>6</sup>, David A Simpson<sup>45</sup>, Joshua B Singer<sup>12</sup>, Igor Siveroni<sup>29</sup>, Christen Smith<sup>6</sup>, Colin P Smith<sup>32</sup>, Darren L Smith<sup>64</sup>, Nikki Smith<sup>11</sup>, Wendy Smith<sup>40</sup>, Alison Smith-Palmer<sup>53</sup>, Katherine Smollett<sup>12</sup>, Joel Southgate<sup>3,42</sup>, Karla Spellman<sup>4</sup>, Michael Spencer-Chapman<sup>6</sup>, Sushmita Sridhar<sup>21</sup>, Rachael Stanley<sup>47</sup>, Richard Stark<sup>5</sup>, James P Stewart<sup>9</sup>, Joanne Stockton<sup>59</sup>, Claire Stuart<sup>47</sup>, David Studholme<sup>57</sup>, Neil Swainston<sup>9</sup>, Emma Swindells<sup>66</sup>, Yusri Taha<sup>41</sup>, Mohammad A Tariq<sup>67</sup>, Ben Taylor<sup>1,2</sup>, Graham P Taylor<sup>14</sup>, Sarah Taylor<sup>3</sup>, Grace Taylor-Joyce<sup>5</sup>, Ana P Tedim<sup>7</sup>, Ben Temperton<sup>57</sup>, Kate E Templeton<sup>16,48</sup>, Emma C Thomson<sup>12</sup>, Nicholas M Thomson<sup>7</sup>, Alicia Thornton<sup>22</sup>, Scott Thurston<sup>6</sup>, John Todd<sup>26</sup>, Lily Tong<sup>12</sup>, Gerry Tonkin-Hill<sup>6</sup>, M. Estée Török<sup>49</sup>, Amy Trebes<sup>26</sup>, Alexander J Trotter<sup>7</sup>, Theocharis Tsoleridis<sup>17</sup>, Rachel M Tucker<sup>11</sup>, Helena J Tutill<sup>30</sup>, Anthony Underwood<sup>1,2</sup>, Meera Unnikrishnan<sup>5</sup>, Ecaterina Vamos<sup>9</sup>, Tetyana Vasylyeva<sup>13</sup>, Sreenu Vattipally<sup>12</sup>, Ana Victoria<sup>7</sup>, Barry Vipond<sup>56</sup>, Erik M Volz<sup>29</sup>, John Wain<sup>7</sup>, Dennis Wang<sup>11</sup>, Joanna Warwick-Dugdale<sup>57</sup>, Elizabeth Wastnedge<sup>48</sup>, Joanne Watkins<sup>3</sup>, Joanne Watts<sup>39</sup>, Mark Webber<sup>7</sup>, Sam Weeks<sup>30</sup>, Danni Weldon<sup>6</sup>, Mark Whitehead<sup>9</sup>, Charlotte A Williams<sup>30</sup>, Chris Williams<sup>3</sup>, David Williams<sup>22</sup>, Rachel Williams<sup>30</sup>, Thomas C Williams<sup>16,48</sup>, Emma

Wise<sup>62</sup>, Victoria Wright<sup>36</sup>, Matthew D Wyles<sup>11</sup>, Sarah Wyllie<sup>23</sup>, Anna Yakovleva<sup>34</sup>, Muhammad Yasir<sup>7</sup>, Corin Yeats<sup>1,2</sup>, Wen C Yew<sup>8</sup>, Greg R Young<sup>8</sup>, Xiaoyu Yu<sup>16</sup>, Alex Zarebski<sup>13</sup>

## Affiliations

<sup>1</sup>Centre for Genomic Pathogen Surveillance, <sup>2</sup>University of Oxford, <sup>3</sup>Public Health Wales NHS Trust, <sup>4</sup>Cardiff and Vale University Health Board, <sup>5</sup>University of Warwick, <sup>6</sup>Wellcome Sanger Institute, <sup>7</sup>Quadram Institute Bioscience, <sup>8</sup>Northumbria University, <sup>9</sup>University of Liverpool, <sup>10</sup>John Radcliffe Hospital, <sup>11</sup>University of Sheffield, <sup>12</sup>MRC University of Glasgow Centre for Virus Research, <sup>13</sup>Department of Zoology, University of Oxford, <sup>14</sup>Section of Virology, Imperial College London, <sup>15</sup>South Tees Hospitals NHS Foundation Trust, <sup>16</sup>University of Edinburgh, <sup>17</sup>Life Sciences, University of Nottingham, Nottingham, <sup>18</sup>North Cumbria Integrated Care NHS Foundation Trust, <sup>19</sup>Centre for Enzyme Innovation, University of Portsmouth, <sup>20</sup>University Hospitals Coventry and Warwickshire, <sup>21</sup>University of Cambridge, <sup>22</sup>PHE Colindale, <sup>23</sup>Portsmouth Hospitals NHS Trust, <sup>24</sup>Imperial College Healthcare NHS Trust, <sup>25</sup>NIHR Health Protection Research Unit in Healthcare Associated Infections and Antimicrobial Resistance, Imperial College London, <sup>26</sup>Nuffield Department of Medicine, University of Oxford, <sup>27</sup>Public Health England, <sup>28</sup>University of Portsmouth, <sup>29</sup>Imperial College London, <sup>30</sup>University College London, <sup>31</sup>Great Ormond Street Hospital for Children NHS Foundation Trust, <sup>32</sup>University of Brighton, <sup>33</sup>Cambridge Institute for Therapeutic Immunology and Infectious Disease, University of Cambridge, <sup>34</sup>Division of Virology, Department of Pathology, University of Cambridge, <sup>35</sup>County Durham and Darlington NHS Foundation Trust, <sup>36</sup>DeepSeq, Life Sciences, University of Nottingham, <sup>37</sup>Northumbria Healthcare NHS Foundation Trust, <sup>38</sup>Health Data Research UK Cambridge, <sup>39</sup>Liverpool University Hospitals NHS Foundation Trust, <sup>40</sup>Nottingham University Hospitals NHS Trust, <sup>41</sup>Newcastle upon Tyne Hospitals NHS Foundation Trust, <sup>42</sup>Cardiff University, <sup>43</sup>Cambridge University Hospitals NHS Foundation Trust, <sup>44</sup>Belfast Health and Social Care Trust, <sup>45</sup>Queen's University Belfast, <sup>46</sup>Sheffield Teaching Hospitals NHS Foundation Trust, <sup>47</sup>Norfolk and Norwich University Hospitals NHS Foundation Trust, <sup>48</sup>NHS Lothian, <sup>49</sup>Department of Medicine, University of Cambridge, <sup>50</sup>West of Scotland specialist virology centre, NHS greater Glasgow and Clyde, <sup>51</sup>Cambridge University Hospital NHS Foundation Trust, <sup>52</sup>Section of Mucosal Infection and Immunity, Imperial College London, <sup>53</sup>Public Health Scotland, <sup>54</sup>University of St Andrews, <sup>55</sup>Newcastle University, <sup>56</sup>PHE South West Regional Laboratory, <sup>57</sup>University of Exeter, <sup>58</sup>NIHR Exeter Clinical Research Facility, <sup>59</sup>Institute of Microbiology and Infection, University of Birmingham, <sup>60</sup>Swansea University, <sup>61</sup>University of Exeter Medical School, <sup>62</sup>University of Surrey, <sup>63</sup>University College London Hospitals NHS Foundation Trust, <sup>64</sup>NU-OMICS, Northumbria University, <sup>65</sup>Department of Veterinary Medicine, University of Cambridge, <sup>66</sup>North Tees and Hartlepool Hospitals NHS Foundation Trust, <sup>67</sup>Quadram Institute

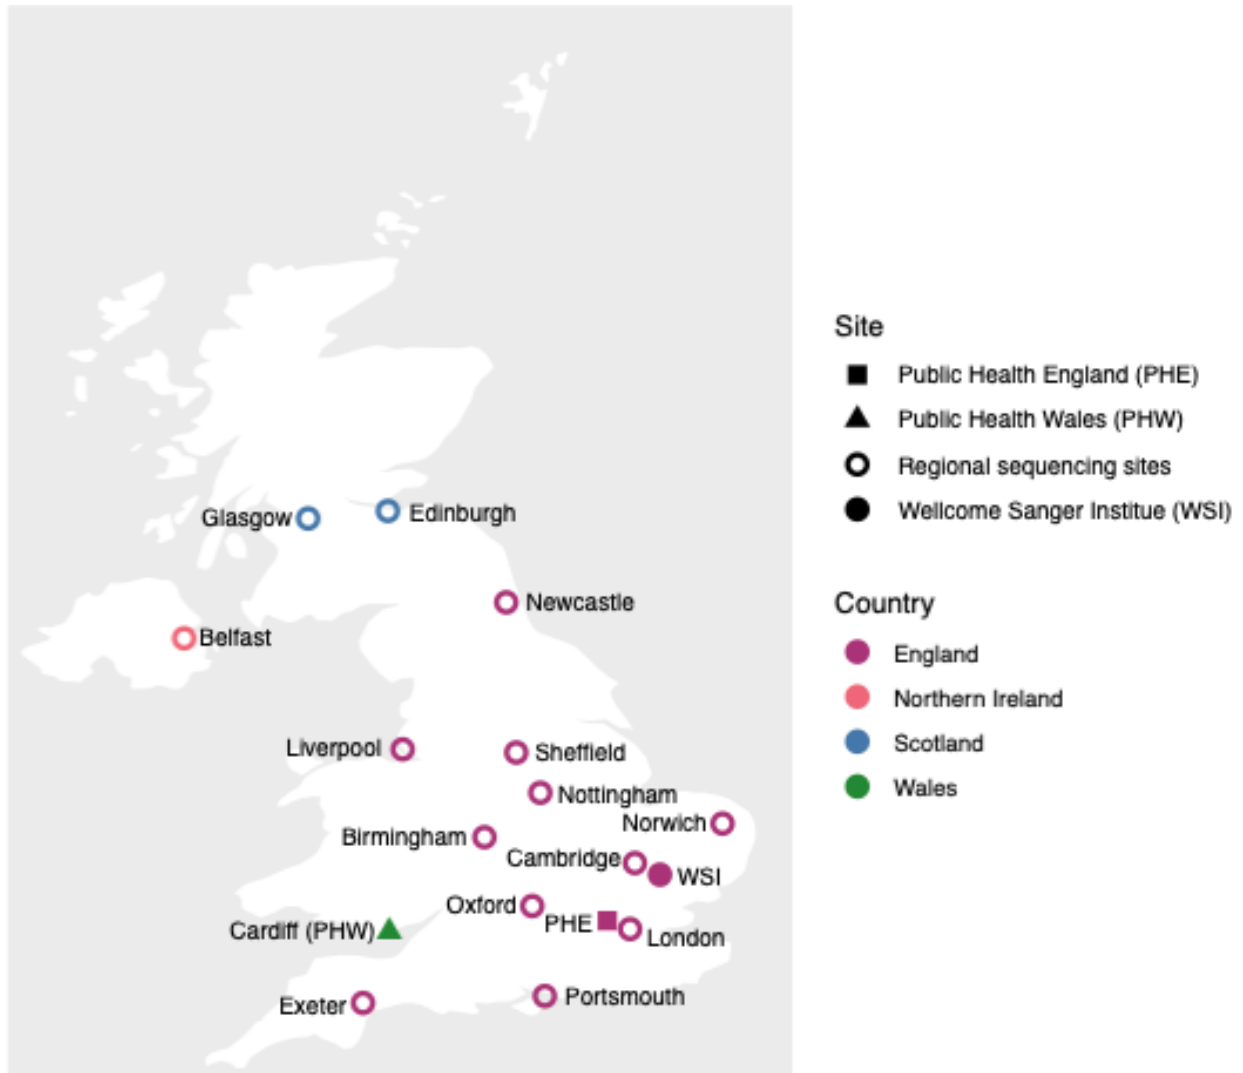

**Figure:** Locations of current COG-UK consortium sequencing sites across the UK.
